# Supplementary material
Source: Springer Nature journal article supplement (https://www.springermedizin.de/resource/supplementary/12913_2012_2444_MOESM1_ESM.pdf/9531108)
Supplement: MOESM1 [file 9531108]

$(\xi 1)$  $(\eta 1)$  $(\eta 2)$ 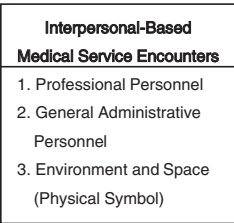 $H1 (+)$ **Service Quality**

1. Response
2. Reliability
3. Assurance

 $H3 (+)$ **Patient Trust** $(\eta 3)$  $H2 (+)$ **Patient Satisfaction** $H4 (+)$
